# Supplementary material for: Skeleton selectivity in complexation of chelerythrine and chelerythrine-like natural plant alkaloids with the G-quadruplex formed at the promoter of c-MYC oncogene: in silico exploration
Source: Royal Society of Chemistry journal article supplement (doi:10.1039/c6ra04671a), 2016-01-01

**Table S1.** ADME properties predicted by QikProp and Docking Score of Chelerythrine and 14 Chelerythrine like molecules found in Supernatural drug database.

| SN. No                     | S | MW      | QPlogP<br>o/w | Q<br>PlogS | Q<br>PPCaco | Q<br>PlogBB | PHOA | RO<br>5 | Glide<br>Dock<br>Score |
|----------------------------|---|---------|---------------|------------|-------------|-------------|------|---------|------------------------|
| <b>Chelerythrine (CHE)</b> | 2 | 349.385 | 4.591         | -4.969     | 9514.447    | 0.426       | 100  | 0       | -5.259                 |
| <b>SN00288441(ONE)</b>     | 2 | 379.412 | 4.34          | -4.809     | 9729.842    | 0.375       | 100  | 0       | -7.645                 |
| <b>SN00375322(TWO)</b>     | 1 | 349.385 | 4.257         | -4.360     | 9729.750    | 0.436       | 100  | 0       | -8.117                 |
| <b>SN00155937(THREE)</b>   | 2 | 349.385 | 4.018         | -4.120     | 9487.679    | 0.426       | 100  | 0       | -7.796                 |
| SN00361551                 | 2 | 379.412 | 4.609         | -4.991     | 9559.997    | 0.368       | 100  | 0       | -7.55                  |
| SN00288491                 | 3 | 393.438 | 4.18          | -6.504     | 9906.038    | -0.787      | 100  | 0       | -7.53                  |
| SN00401299                 | 0 | 335.359 | 3.716         | -4.320     | 4236.699    | 0.110       | 100  | 0       | -7.47                  |
| SN00388080                 | 2 | 379.412 | 4.146         | -4.891     | 9705.696    | 0.374       | 100  | 0       | -7.44                  |
| SN00286890                 | 2 | 393.395 | 3.525         | -3.588     | 9678.933    | 0.434       | 100  | 0       | -7.41                  |
| SN00000050                 | 2 | 333.343 | 3.839         | -3.990     | 9503.988    | 0.548       | 100  | 0       | -7.36                  |
| SN00339333                 | 2 | 363.369 | 3.519         | -3.717     | 9740.327    | 0.497       | 100  | 0       | -7.08                  |
| SN00276392                 | 1 | 365.385 | 3.479         | -4.042     | 4136.874    | 0.086       | 100  | 0       | -6.97                  |
| SN00160090                 | 2 | 363.369 | 3.941         | -4.187     | 9621.772    | 0.492       | 100  | 0       | -6.9                   |
| SN00160089                 | 2 | 379.412 | 4.691         | -5.158     | 9616.731    | 0.370       | 100  | 0       | -6.78                  |
| SN00126678                 | 4 | 189.213 | 2.558         | -2.282     | 9631.381    | 0.554       | 100  | 0       | -6.73                  |

**SN No.**= Supernatural drug database ID

**S (STARS)** = Number of property/descriptor values falling outside the 95% range of similar values for known drugs. Recommended value 0-5.

**MW** = Molecular weight

**QPlogPo/w** = Predicted octanol / water partition coefficient. Recommended values -2.0 – 6.5.

**QPlogS** = Predicted aqueous solubility, log S. Recommended values -6.5 – 0.5.

**QPPCaco** = Predicted apparent Caco-2 cell permeability in nm/sec. Recommended values <25 poor, >500 great.

**QPlogBB** = Predicted brain/blood partition coefficient. Recommended values -3.0 – 1.2.

**PHOA**= Predicted human oral absorption on 0 to 100% scale. Recommended values >80% is high <25% is poor

**RO5**= Rule of Five, The rules are: mol\_MW < 500, QPlogPo/w < 5, donorHB ≤ 5, and acptHB ≤ 10.

**White color rows:** Compounds selected for further analysis

**Gray color rows:** Compounds are not studied further

\* The scores given are approximate values as predicted by the software and not measured experimentally.

### Captions for Supplementary Fig.:

**Fig. S1.** Comparison of conformation of Chelerythrine bound to *Pu27* in its initial docked pose with that of the conformation obtained after 50 ns simulation.

**Fig. S2.** Comparison of conformation of THREE bound to *Pu27* in its initial docked pose with that of the conformation obtained after 50 ns simulation.

**Fig. S3.** Comparison of conformation of ONE bound to *Pu27* in its initial docked pose with that of the conformation obtained after 50 ns simulation.

**Fig. S4.** Comparison of conformation of TWO bound to *Pu27* in its initial docked pose with that of the conformation obtained after 50 ns simulation.

**Fig. S5.** Water grid density map of *Pu27* in different complexation states: (A) CHE-complex, (B) ONE-complex, (C) unbound *PU27*, (D) TWO-complex, (E) THREE-complex.

**Fig. S6.** Illustration of total number of water molecules in the inner and outer shell of ligand per unit time (ns), inner shell and outer shell represent the area within the radius of 3.4 Å and 5 Å from the centroid of the ligand respectively. (A) Number of water molecules in inner shell of CHE and ONE, (B) Number of water molecules in outer shell of CHE and ONE, (C) Number of water molecules in inner shell of TWO and THREE, (D) Number of water molecules in outer shell of TWO and THREE

**Fig. S7.** Porcupine plots of first (A-E) and second eigenvectors (F-J) of ONE-complex. Time frames are mentioned for respective plots. Blue color is for quadruplex structure and magenta color is for compound ONE. (Images are prepared in PyMOL)

Fig. S1

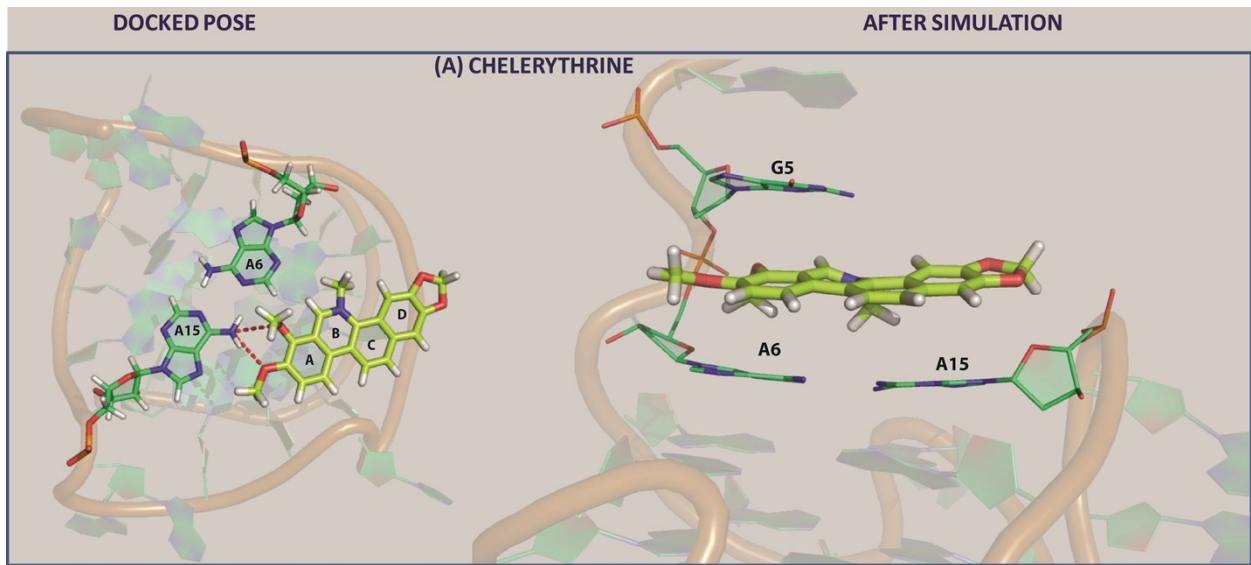

Fig. S2

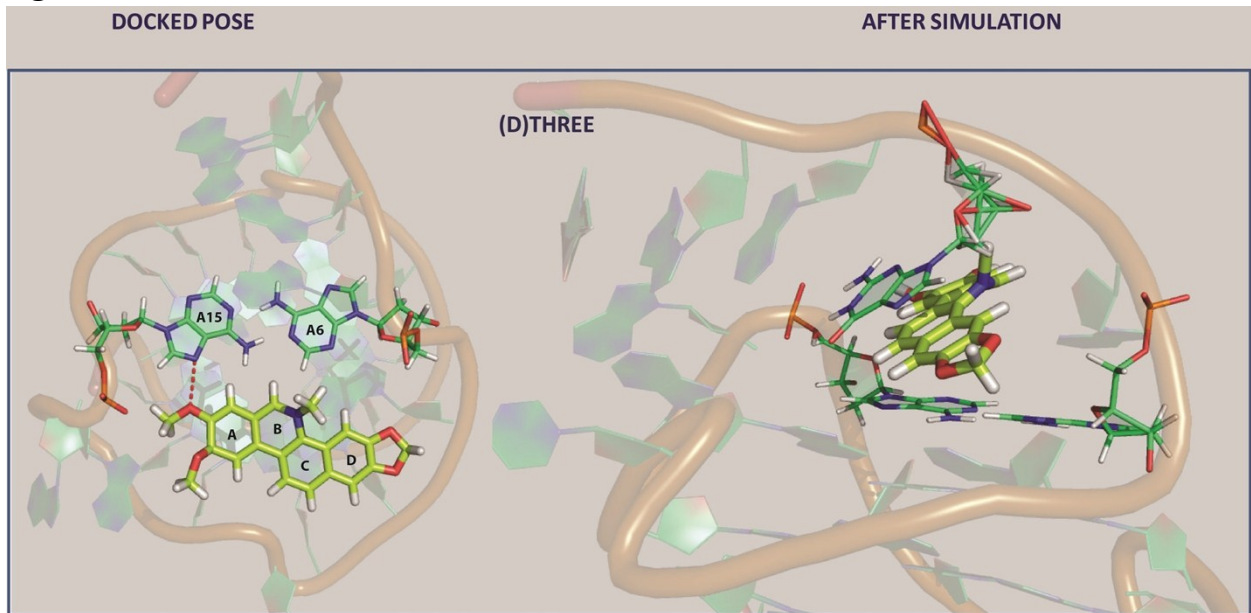

Fig. S3

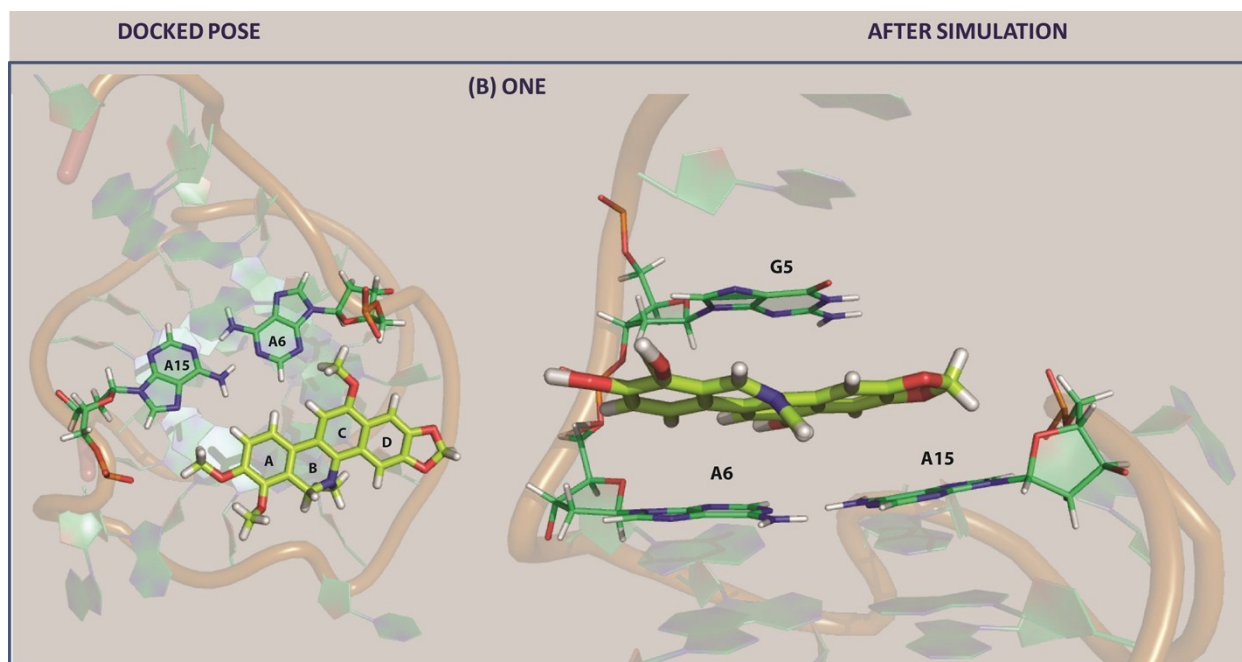

Fig. S4

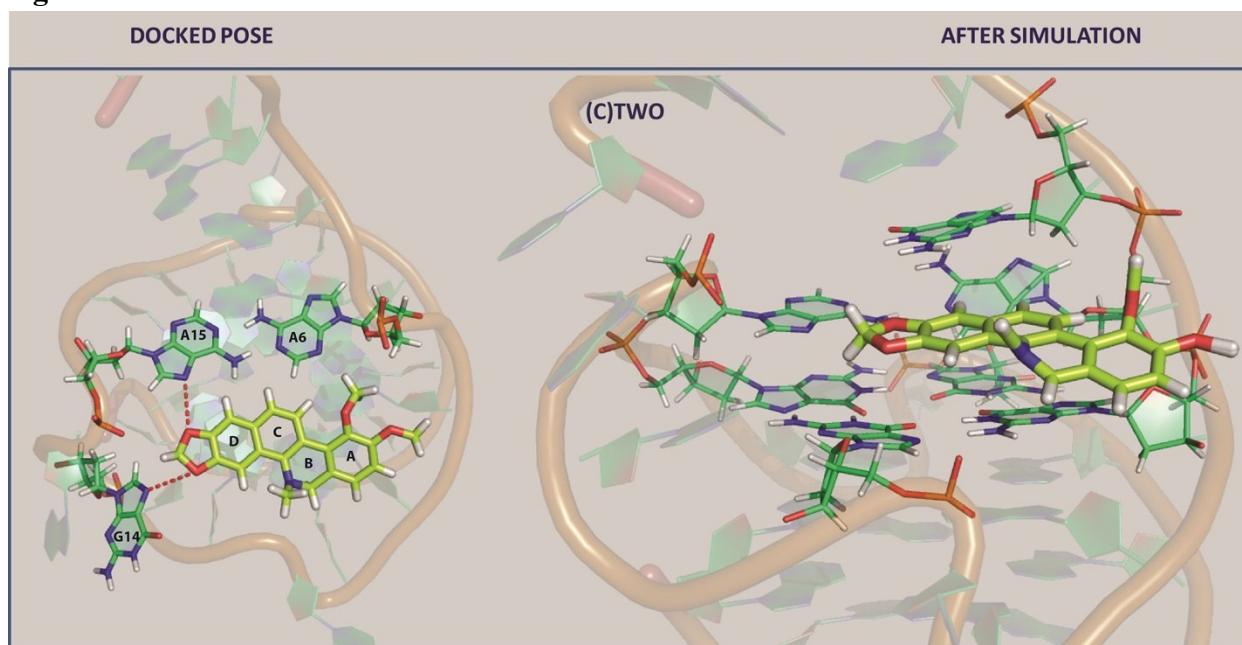

**Fig. S5**

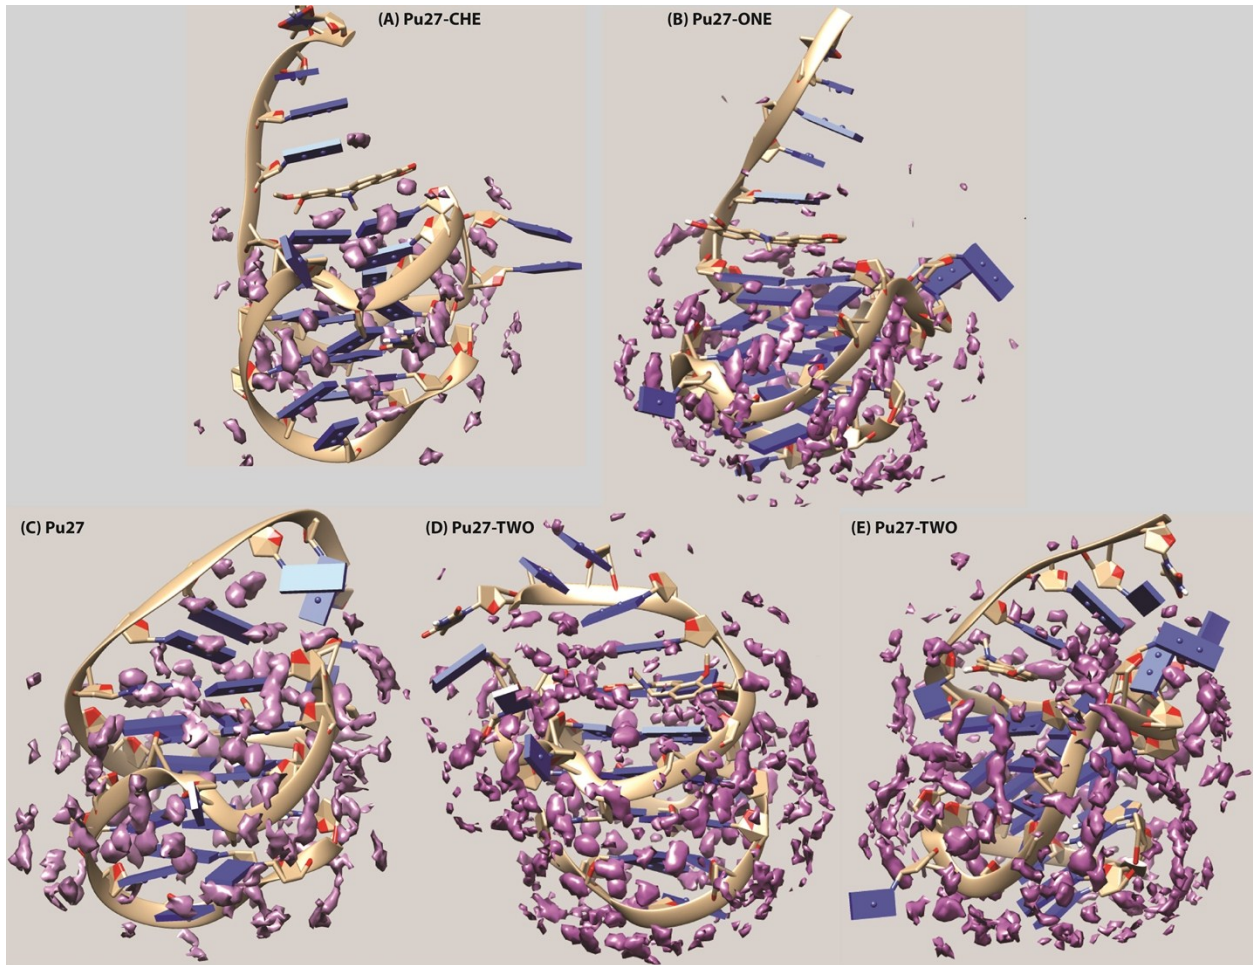

**Fig. S6**

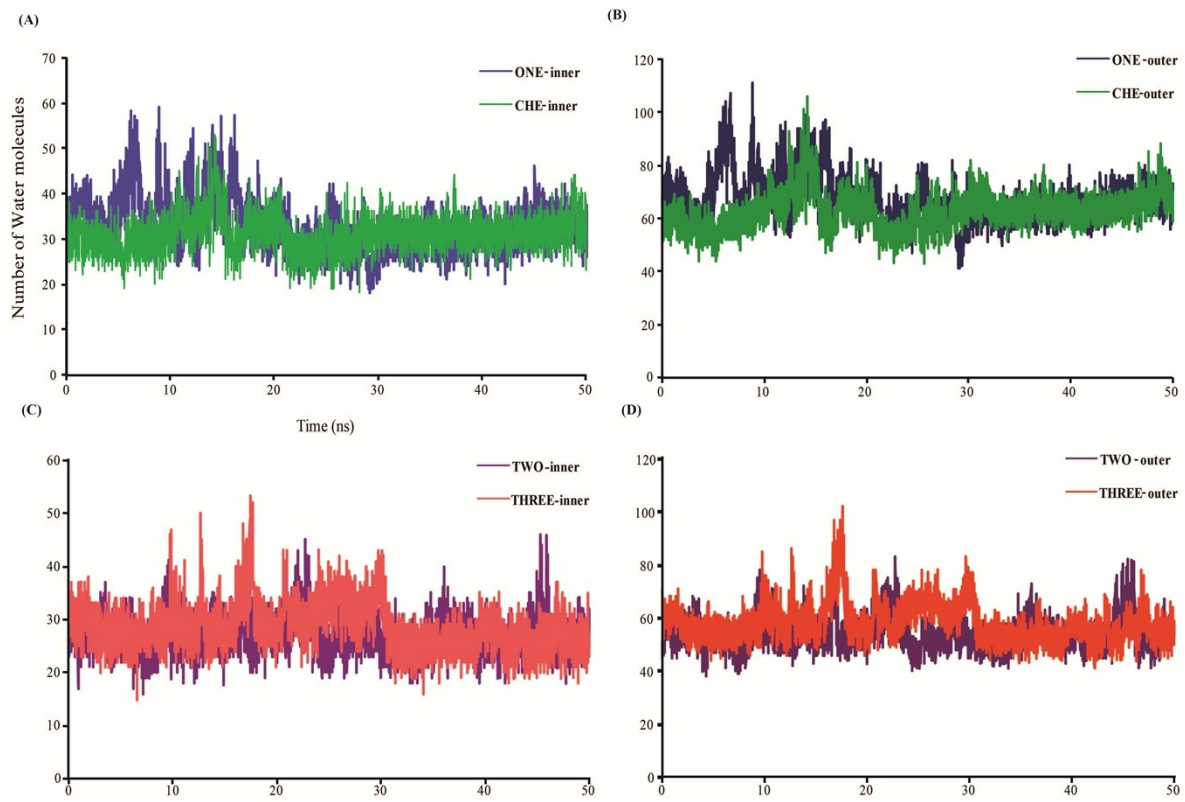

**Fig. S7**

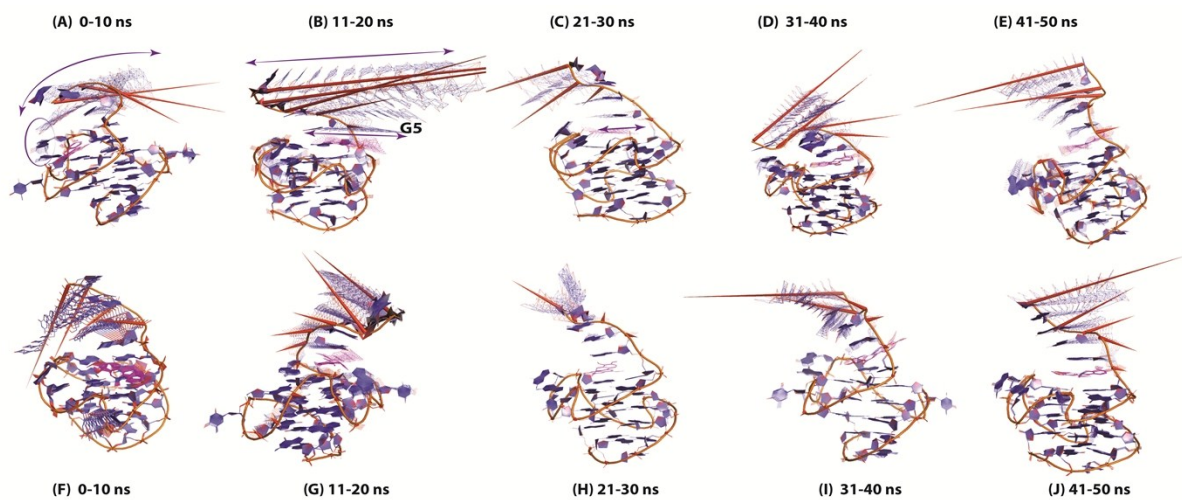

Supplement: c6ra04671a5.pdf [file c6ra04671a5.pdf]
